# Supplementary material for: Prox1 and fibroblast growth factor receptors form a novel regulatory loop controlling lens fiber differentiation and gene expression
Source: Oxford University Press journal article supplement (doi:10.1242/dev.127860), 2015-01-01
Supplement: dev127860supp.pdf [file dev127860supp.pdf]

Supplementary Table 1: primers

| gene           | target | species | forward                           | reverse                           |
|----------------|--------|---------|-----------------------------------|-----------------------------------|
| Prox1          | DNA    | mouse   | CTC TGT GGA AAG GAC TCC GAA TC    | ACA CTA AAC AAG CAA ATG GAA ATG C |
| MLR10Cre       | DNA    | mouse   | CCT GTT TTG CAC GTT CAC CG        | ATG CTT CTG TCC GTT TGC CG        |
| Cdkn1b         | mRNA   | mouse   | GCC AGA CGT AAA CAG CTC CGA ATT A | AGG CAG ATG GTT TAA GAG TGC CT    |
| Cdkn1C         | mRNA   | mouse   | CAA GCG AAC AGG CAG GCA AGC       | TCG AAG GCT GGC TGA TTG GTG       |
| Maf            | mRNA   | mouse   | GTG GTG GTG ATG GCT CTT TT        | GTT ACG GGG GAA TTC AGG TT        |
| Cryaa          | mRNA   | mouse   | GAG ATT CAC GGC AAA CAC AA        | ACA TTG GAA GGC AGA CGG TA        |
| Cryab          | mRNA   | mouse   | ACT CAA AGT CAA GGT TCT GGG       | GGG ATG AAG TGA TGG TGA GAG       |
| Cryba1         | mRNA   | mouse   | TGG AGT GTG GCG CCT GGA TT        | CAT TGC TCC CGC TCC AGG CAT       |
| Cryba3/a1      | mRNA   | mouse   | CCT GGA GCG GGA GCA ATG CC        | TCA CAG ATT TCC CAC TGG CGT CC    |
| Crybb2         | mRNA   | mouse   | GTG CAG AGC GGC ACG TGG GT        | TGT CAC GGA TGC GAC GCA CA        |
| Crygc          | mRNA   | mouse   | CAT CCC CCA TGC AGG TTC           | AGC CCG CCT TAG CAT CTA CA        |
| Fgfr1          | mRNA   | mouse   | AGC CCC TCT GGC AGC GAT ACC       | AGG GAG CTA CAG GCC TAC GGT T     |
| Fgfr2          | mRNA   | mouse   | GGG GGC GCT TCA TCT GCC TG        | CGG TGC TCC TTC TGG TTC TAA AGT G |
| Fgfr3          | mRNA   | mouse   | CAG TGT GCG TGT AAC AGA TGC TCC A | TCG CTC CGG GCG AGT CCA AT        |
| Lct1           | mRNA   | mouse   | GCA CTG GCC TAT ATG TGG CT        | TAC TAG GCC GTG CTG TTT GC        |
| Mafb           | mRNA   | mouse   | GCC TCT TAG ACT TGG GCA GA        | CCT TCC AGC TTG GAG AA AG         |
| Mip            | mRNA   | mouse   | CGT GCT CTG CAT CTT TGC TA        | ACC CTC CCC ACA GTC TCT TT        |
| Pax6           | mRNA   | mouse   | GCA CAT GCA AAC ACA CAT GA        | ACT TGG ACG GGA ACT GAC AC        |
| Prox1          | mRNA   | mouse   | AGT AAG ACA TCA CCG CGT GCG C     | GCT GGG CAC AGC TCA AGA ATC CC    |
| Sox1           | mRNA   | mouse   | GGC CAA GCG GCT GCG GCG GCT       | GGC CAG CTG CGC CTC CTG CAT       |
| Sox2           | mRNA   | mouse   | GGC AGC TAC AGC ATG ATG CAG GAG C | CTG GTC ATG GAG TTG TAC TGC AGG   |
| Crybb1         | mRNA   | mouse   | CAG GGC CTG ATG GCA AGG GAA       | CCT GCT CGA AGA CGA TCA GCC       |
| Cdh1           | mRNA   | mouse   | GCACTTCTCCTGCTGCTG                | TATGAGGCTGTGGTTCCCTC              |
| Fgfr1          | mRNA   | mouse   | TCT TCA GGC TTC AGG TTC TTC AAG C | AGG AGG ACC CAG CCA GC            |
| 18S rDNA       | RNA    | mouse   | QUIAGEN PPM57735E-200             |                                   |
| -0.15 Kb       |        |         |                                   |                                   |
| Crybb1         | DNA    | chicken | TCT GTT GTG CCG CTG GAT A         | CCA GTC ATC ACA TCC TGC AA        |
| -05 Kb Spam1   | DNA    | chicken | AGC TGC ACT CCA GTC CTT TC        | GTA GCC TCT GGC ATG GTG TT        |
| -2 Kb Lct1     | DNA    | chicken | AGG AAG ATG TCT CAC CCC TGA       | TCC CTC CTG CAA TAG GTG GTA       |
| -0.4 Kb Lct1   | DNA    | chicken | CCC AGT GGG GGA GCA ATA AA        | TGT ATC GAA GTG ACA TCA GCG       |
| -0.05 Kb Lct1  | DNA    | chicken | ATT CAC AGG CTG GAA ACT CC        | TGT ACA ATG CGG GAG AAG TGA       |
| +5 Kb Lct1     | DNA    | chicken | AGC CTG GCT TGC ATG TGT AT        | GGA GTG TTC AGA AGT GTG GGA       |
| -2 Kb Fgfr3    | DNA    | chicken | GAG AGG CTC AGA CAC CGA AC        | AGT CTC CTG CTG AGT GAC CA        |
| -0.14 Kb Fgfr3 | DNA    | chicken | TCC CAT CCC CGT ATT CAG GA        | ATG TGT TCG GTG TCT GAG CC        |
| +5 Kb Fgfr3    | DNA    | chicken | ACT GAC TCC ATG CTC TCC CT        | GCA GGC AGC AAA ACT TCC AA        |
| -2 Kb Fgfr1    | DNA    | chicken | TCT GGA TGC CCA AAG ATG GAG       | TGC CTC CTG TAG ACT TTC CCA       |
| -0.038 Kb      |        |         |                                   |                                   |
| Fgfr1          | DNA    | chicken | AGC TCA TCT CAG GAA ACG GC        | CAT AGG CTG CGT GTC CAT CT        |
| -0.15 Kb Fgfr1 | DNA    | chicken | TGC CCG TGG CGG TTG               | AGC TCC AAA CTT CGC TCC AA        |
| +5 Kb Fgfr1    | DNA    | chicken | TTC TCT CTG CAC CAC TTG GC        | TAG TCC CAA CAA CAC GTT CCC       |
| Prox1          | mRNA   | chicken | AGA TGG AGA AGT ATG CGC GG        | CTG GAA CCT CAA AGT CAT TCG C     |
| Fgfr1          | mRNA   | chicken | GGG GTA CAA GGT CCG CTA TG        | GTG TGG TTG ATG CTC CCG TA        |
| Fgfr2          | mRNA   | chicken | TCT GCC AGC TCC TGA AAA GG        | TTC TTC ATG CGG CAC AGG AT        |
| Fgfr3          | mRNA   | chicken | GGA AAC CCA ACT CCC ACC AT        | GCT GGT GTC GCA ACT TGA TG        |
| Fgfr1          | mRNA   | chicken | CAG TCC TGC CAG ATC CCA AG        | GCA AAG CCA CAG GAG GAT TG        |
| Lct1           | mRNA   | chicken | TCA CAC TCT GCA TAC TCA CCA G     | ACA GCT GGC TTA CTG TAT TGT       |
| 18s            | mRNA   | chicken | TGT GCC GCT AGA GGT GAA ATT       | TGG CAA ATG CTT TCG CTT T         |

Supplementary Table 2: immunofluorescence and immunohistochemistry procedures

| Gene Symbol                   | Antibody                   | Sample Prep                                           | Fixation                                                                                                                            | Blocking                                                                                                                      | Primary                                                                                                                                                                       | secondary                                                                                                                                                                         | final wash                                                                                                                                              |
|-------------------------------|----------------------------|-------------------------------------------------------|-------------------------------------------------------------------------------------------------------------------------------------|-------------------------------------------------------------------------------------------------------------------------------|-------------------------------------------------------------------------------------------------------------------------------------------------------------------------------|-----------------------------------------------------------------------------------------------------------------------------------------------------------------------------------|---------------------------------------------------------------------------------------------------------------------------------------------------------|
| Prox1                         | from Duncan MK et al. 2002 | Frozen tissue was sectioned (16uM) and stored at -80C | immersion in 1:1 acetone/methanol at -20C for 15 minutes, then slides were air dried                                                | Slides were immersed in 1% Bovine Serum Albumin (BSA) in Phosphate buffered saline (PBS) for 1 hour at room temperature (RT). | Primary antibody was diluted 1:500 in blocking buffer, and applied to tissue for 1 hour at RT in a humid slide chamber. Slides were then washed 3 times for 5 minutes in PBS. | Secondary Alexafluor 568 conjugated anti-rabbit antibody was diluted 1:200 in blocking buffer with 1:2000 Draq5, and applied to tissue for 1 hour at RT in a humid slide chamber. | Slides were washed 3 times for ten minutes with PBS then covered with mounting media, coverslipped and sealed, slides were stored at -20C until imaged. |
| cMaf                          | Santa Cruz: sc-7866        | Frozen tissue was sectioned (16uM) and stored at -80C | immersion in 1:1 acetone/methanol at -20C for 15 minutes, then slides were air dried                                                | Slides were immersed in 1% Bovine Serum Albumin (BSA) in Phosphate buffered saline (PBS) for 1 hour at room temperature (RT). | Primary antibody was diluted 1:100 in blocking buffer, and applied to tissue for 1 hour at RT in a humid slide chamber. Slides were then washed 3 times for 5 minutes in PBS. | Secondary Alexafluor 568 conjugated anti-rabbit antibody was diluted 1:200 in blocking buffer with 1:2000 Draq5, and applied to tissue for 1 hour at RT in a humid slide chamber. | Slides were washed 3 times for ten minutes with PBS then covered with mounting media, coverslipped and sealed, slides were stored at -20C until imaged. |
| Pax6                          | Santa Cruz: sc-53106       | Frozen tissue was sectioned (16uM) and stored at -80C | immersion in 4% paraformaldehyde (pfa) in PBS for 20 min @ RT, then slides were washed in tris buffered saline (TBS) for 5 minutes. | Samples were covered with 5% normal goat serum in TBS supplemented with .3% Triton x100                                       | Primary antibody was diluted 1:200 in blocking buffer, and applied to tissue overnight in a humid slide chamber at 4C. Slides were then washed 3 times for 10 minutes in TBS. | Secondary Alexafluor 568 conjugated anti-rabbit antibody was diluted 1:200 in blocking buffer with 1:2000 Draq5, and applied to tissue for 1 hour at RT in a humid slide chamber. | Slides were washed 3 times for ten minutes with TBS then covered with mounting media, coverslipped and sealed, slides were stored at -20C until imaged. |
| ECad                          | Cell Signaling : 4065      | Frozen tissue was sectioned (16uM) and stored at -80C | immersion in 4% paraformaldehyde (pfa) in PBS for 20 min @ RT, then slides were washed in tris buffered saline (TBS) for 5 minutes. | Samples were covered with 5% normal goat serum in TBS supplemented with .3% Triton x100                                       | Primary antibody was diluted 1:100 in blocking buffer, and applied to tissue overnight in a humid slide chamber at 4C. Slides were then washed 3 times for 10 minutes in TBS. | Secondary Alexafluor 568 conjugated anti-rabbit antibody was diluted 1:200 in blocking buffer with 1:2000 Draq5, and applied to tissue for 1 hour at RT in a humid slide chamber. | Slides were washed 3 times for ten minutes with TBS then covered with mounting media, coverslipped and sealed, slides were stored at -20C until imaged. |
| Cdnc1b (p27 <sup>KIP1</sup> ) | Santa Cruz: sc-528         | Frozen tissue was sectioned (16uM) and stored at -80C | immersion in 4% paraformaldehyde (pfa) in PBS for 20 min @ RT, then slides were washed in tris buffered saline (TBS) for 5 minutes. | Samples were covered with 5% normal goat serum in TBS supplemented with .3% Triton x100                                       | Primary antibody was diluted 1:100 in blocking buffer, and applied to tissue overnight in a humid slide chamber at 4C. Slides were then washed 3 times for 10 minutes in TBS. | Secondary Alexafluor 568 conjugated anti-rabbit antibody was diluted 1:200 in blocking buffer with 1:2000 Draq5, and applied to tissue for 1 hour at RT in a humid slide chamber. | Slides were washed 3 times for ten minutes with TBS then covered with mounting media, coverslipped and sealed, slides were stored at -20C until imaged. |
| Mip (Aqp0)                    | Millipore : AB3071         | Frozen tissue was sectioned (16uM) and stored at -80C | immersion in 1:1 acetone/methanol at -20C for 15 minutes, then slides were air dried                                                | Slides were immersed in 1% Bovine Serum Albumin (BSA) in Phosphate buffered saline (PBS) for 1 hour at room temperature (RT). | Primary antibody was diluted 1:100 in blocking buffer, and applied to tissue for 1 hour at RT in a humid slide chamber. Slides were then washed 3 times for 5 minutes in PBS. | Secondary Alexafluor 568 conjugated anti-rabbit antibody was diluted 1:200 in blocking buffer with 1:2000 Draq5, and applied to tissue for 1 hour at RT in a humid slide chamber. | Slides were washed 3 times for ten minutes with PBS then covered with mounting media, coverslipped and sealed, slides were stored at -20C until imaged. |

|                                |                                                        |                                                               |                                                                                                                                                                                                                           |                                                                                                                                                                                                                                                                                                                                                                                                         |                                                                                                                                                                                                          |                                                                                                                                                                                                                                                              |                                                                                                                                                         |
|--------------------------------|--------------------------------------------------------|---------------------------------------------------------------|---------------------------------------------------------------------------------------------------------------------------------------------------------------------------------------------------------------------------|---------------------------------------------------------------------------------------------------------------------------------------------------------------------------------------------------------------------------------------------------------------------------------------------------------------------------------------------------------------------------------------------------------|----------------------------------------------------------------------------------------------------------------------------------------------------------------------------------------------------------|--------------------------------------------------------------------------------------------------------------------------------------------------------------------------------------------------------------------------------------------------------------|---------------------------------------------------------------------------------------------------------------------------------------------------------|
| Cdkn 1c (p57 <sup>Kip2</sup> ) | Santa Cruz: sc-8298                                    | Paraffin embedded tissue was sectioned (6µM) and stored at RT | sections were dewaxed by two five minute immersions in xylenes, then 2 minute immersions in decreasing concentrations of ethanol in water (100%, 95%, 70%, 50%) followed by a brief rinse in running distilled water.     | Antigen retrieval: slides were double boiled in 0.1M Sodium citrate pH6.0 for 30 minutes, and allowed to cool for 10 minutes. Slides were rinsed in dH2O for 2 minutes and washed in PBS for 5 minutes. Slides were immersed in 1% Saponin in PBS for 5 minutes, followed by 3 5 minute immersions in PBS with 0.1% Tween 20 (PBS-T). Slides were then blocked in 10% NGS in PBST for 30 minutes at RT. | Primary antibody was diluted 1:100 in blocking buffer, and applied to tissue overnight in a humid slide chamber at 4C. Slides were then washed 3 times for 10 minutes in PBS.                            | Secondary Alexafluor 568 conjugated anti-rabbit antibody was diluted 1:200 in blocking buffer with 1:2000 Draq5, and applied to tissue for 2 hours at RT in a humid slide chamber.                                                                           | Slides were washed 3 times for ten minutes with PBS then covered with mounting media, coverslipped and sealed, slides were stored at -20C until imaged. |
| Cryg (gamma-crystallin)        | Santa Cruz: sc-22415                                   | Frozen tissue was sectioned (16µM) and stored at -80C         | immersion in 4% paraformaldehyde (pfa) in PBS for 20 min @ RT, then slides were washed in tris buffered saline (PBS) for 5 minutes.                                                                                       | Samples were covered with 5% normal chicken serum in PBS supplemented with .3% Triton x100                                                                                                                                                                                                                                                                                                              | Primary antibody was diluted 1:100 in blocking buffer, and applied to tissue for 4 hours in a humid slide chamber at RT. Slides were then washed 3 times for 10 minutes in PBS.                          | Secondary Alexafluor 568 conjugated anti-rabbit antibody was diluted 1:200 in blocking buffer with 1:2000 Draq5, and applied to tissue for 2 hours at RT in a humid slide chamber.                                                                           | Slides were washed 3 times for ten minutes with PBS then covered with mounting media, coverslipped and sealed, slides were stored at -20C until imaged. |
| Cryb (beta-crystallin)         | gift from Samuel Zigler, Johns Hopkins University, MD) | Paraffin embedded tissue was sectioned (6µM) and stored at RT | paraffin sections were de-waxed by two immersions in Citrus Clearing Solvent for 10 minutes. Samples were rehydrated by immersion in decreasing concentrations of ethanol in water (100% 3x 3min, 95% 3x 2min, 70% 2 min. | Samples were processed using the Dako Envision horseradish peroxidase (HRP) kit. Endogenous peroxides were eliminated covering samples with peroxidase blocking solution.                                                                                                                                                                                                                               | Primary antibody was diluted 1:600 in PBST and incubated in a humid slide chamber for 30 minutes at RT.                                                                                                  | Slides were treated with anti rabbit conjugated HRP for 30 min and washed in PBS 3 times for five minutes. Slides were treated with 3,3'-diaminobenzidine (DAB) chromogen in pairs of controls and experimental slides until the tissue was visibly stained. | Slides were counterstained with Hematoxylin, and dehydrated and sealed according to our H&E protocol.                                                   |
| p-ERK (phosphorylated ERK)     | Cell Signaling : 4377s                                 | Paraffin embedded tissue was sectioned (6µM) and stored at RT | paraffin sections were de-waxed by two immersions in Citrus Clearing Solvent for 10 minutes. Samples were rehydrated by immersion in decreasing concentrations of ethanol in water (100% 3x 3min, 95% 3x 2min, 70% 2 min. | Antigen retrieval: slides were double boiled in 0.1M Sodium citrate pH6.0 for 30 minutes, and allowed to cool for 10 minutes. Slides were rinsed in dH2O for 2 minutes and washed in PBS for 5 minutes. Slides were immersed in 1% Saponin in PBS for 5 minutes, followed by 3 5 minute immersions in PBS with 0.1% Tween 20 (PBS-T). Slides were then blocked in 10% NGS in PBST for 30 minutes at RT. | Slides were processed using the standard procedure outlined in the CSAII Biotin-Free Tyramide Signal Amplification kit with the CSAII rabbit link addition from DAKO. Primary antibody was diluted 1:50. |                                                                                                                                                                                                                                                              | Slides were counterstained with Hematoxylin, and dehydrated and sealed according to our H&E protocol.                                                   |

|                            |                        |                                                               |                                                                                                                                                                                                                           |                                                                                                                                                                                                                                                                                                                                                                                                         |                                                                                                                                                                                                          |                                                                                                       |
|----------------------------|------------------------|---------------------------------------------------------------|---------------------------------------------------------------------------------------------------------------------------------------------------------------------------------------------------------------------------|---------------------------------------------------------------------------------------------------------------------------------------------------------------------------------------------------------------------------------------------------------------------------------------------------------------------------------------------------------------------------------------------------------|----------------------------------------------------------------------------------------------------------------------------------------------------------------------------------------------------------|-------------------------------------------------------------------------------------------------------|
| p-AKT (Phosphorylated AKT) | Cell Signaling : 9271s | Paraffin embedded tissue was sectioned (6µM) and stored at RT | paraffin sections were de-waxed by two immersions in Citrus Clearing Solvent for 10 minutes. Samples were rehydrated by immersion in decreasing concentrations of ethanol in water (100% 3x 3min, 95% 3x 2min, 70% 2 min. | Antigen retrieval: slides were double boiled in 0.1M Sodium citrate pH6.0 for 30 minutes, and allowed to cool for 10 minutes. Slides were rinsed in dH2O for 2 minutes and washed in PBS for 5 minutes. Slides were immersed in 1% Saponin in PBS for 5 minutes, followed by 3 5 minute immersions in PBS with 0.1% Tween 20 (PBS-T). Slides were then blocked in 10% NGS in PBST for 30 minutes at RT. | Slides were processed using the standard procedure outlined in the CSAIL Biotin-Free Tyramide Signal Amplification kit with the CSAIL rabbit link addition from DAKO. Primary antibody was diluted 1:50. | Slides were counterstained with Hematoxylin, and dehydrated and sealed according to our H&E protocol. |
|----------------------------|------------------------|---------------------------------------------------------------|---------------------------------------------------------------------------------------------------------------------------------------------------------------------------------------------------------------------------|---------------------------------------------------------------------------------------------------------------------------------------------------------------------------------------------------------------------------------------------------------------------------------------------------------------------------------------------------------------------------------------------------------|----------------------------------------------------------------------------------------------------------------------------------------------------------------------------------------------------------|-------------------------------------------------------------------------------------------------------|

Supplementary Table 3: genes down-regulated following Prox1 loss

| feature ID    | fold change | FDR Pvalue | ensembl gene id     | Prox1 rpkm mean | C57 rpkm mean | feature ID    | fold change | FDR Pvalue | ensembl gene id     | Prox1 rpkm mean | C57 rpkm mean |
|---------------|-------------|------------|---------------------|-----------------|---------------|---------------|-------------|------------|---------------------|-----------------|---------------|
| Lctl          | -190.8      | 1.7E-13    | ENSMUSG00000032401  | 0.03            | 2.91          | Ndrgr1        | -11.4       | 1.4E-16    | ENSMUSG00000005125  | 0.67            | 5.68          |
| Dnase2b       | -73.3       | 4.4E-11    | ENSMUSG00000028185  | 0.12            | 5.55          | Mafa          | -11.3       | 2.7E-33    | ENSMUSG00000047591  | 1.24            | 10.27         |
| Birc7         | -68.0       | 2.9E-14    | ENSMUSG00000038840  | 0.14            | 6.78          | Gpr160        | -11.1       | 2.6E-83    | ENSMUSG00000037661  | 1.55            | 12.93         |
| D630024D03Rik | -64.5       | 1.4E-10    | ENSMUSG00000085772  | 0.08            | 3.60          | Cryba1        | -11.1       | 3.9E-42    | ENSMUSG00000000724  | 976.24          | 8287.86       |
| Tmprss11e     | -61.6       | 1.4E-06    | ENSMUSG00000054537  | 0.09            | 4.03          | Ggct          | -10.9       | 2E-26      | ENSMUSG00000002797  | 1.46            | 12.15         |
| Crygf         | -52.6       | 3.6E-15    | ENSMUSG00000025945  | 92.23           | 3723.47       | 1300017J02Rik | -10.7       | 1.4E-65    | ENSMUSG00000033688  | 1.62            | 13.03         |
| Bfsp1         | -39.2       | 2.9E-22    | ENSMUSG00000027420  | 18.66           | 555.71        | Tmem179       | -10.5       | 1.6E-09    | ENSMUSG00000054013  | 0.33            | 2.53          |
| Crygb         | -38.7       | 1.7E-21    | ENSMUSG00000073658  | 276.61          | 8240.52       | Bfsp2         | -10.4       | 4E-26      | ENSMUSG00000032556  | 19.66           | 155.26        |
| Scn11a        | -31.0       | 8.9E-52    | ENSMUSG00000034115  | 0.15            | 3.53          | Lim2_2        | -10.4       | 9.4E-41    | NA                  | 31.34           | 249.57        |
| Drd4          | -30.4       | 6.5E-76    | ENSMUSG00000025496  | 0.61            | 12.18         | Caprin2       | -10.3       | 7.8E-37    | ENSMUSG00000030309  | 20.60           | 163.11        |
| Hopx          | -25.5       | 2.3E-22    | ENSMUSG00000059325  | 0.92            | 17.11         | Tmem40        | -10.3       | 6.3E-47    | ENSMUSG00000059900  | 15.31           | 120.59        |
| Scnn1b        | -23.2       | 2.2E-47    | ENSMUSG00000030873  | 1.53            | 26.32         | Cabp5         | -10.2       | 1.1E-10    | ENSMUSG00000005649  | 0.34            | 2.56          |
| Gm20757       | -23.1       | 2.9E-14    | ENSMUSG00000098040  | 1.95            | 33.54         | Tmod1         | -10.2       | 1.8E-56    | ENSMUSG00000028328  | 1.79            | 13.66         |
| Crygd         | -21.6       | 1.3E-31    | ENSMUSG00000067299  | 318.25          | 5283.50       | Fam89a        | -10.1       | 1.5E-33    | ENSMUSG00000043068  | 4.59            | 34.86         |
| Hspb3         | -21.3       | 5.9E-35    | ENSMUSG00000051456  | 1.24            | 17.73         | B230206L02Rik | -10.0       | 1.4E-08    | ENSMUSG00000086003  | 0.27            | 2.09          |
| Sct           | -21.2       | 3.9E-16    | ENSMUSG00000038580  | 0.20            | 3.35          | Dmtn          | -9.8        | 7.7E-54    | ENSMUSG00000022099  | 1.75            | 12.88         |
| Gm14546       | -20.5       | 3.1E-19    | ENSMUSG00000086762  | 0.17            | 2.44          | Zfp365        | -9.8        | 9E-51      | ENSMUSG00000037855  | 8.10            | 61.18         |
| Pgam2         | -20.3       | 9.8E-33    | ENSMUSG00000020475  | 11.10           | 171.23        | Crybb3        | -9.6        | 4.8E-42    | ENSMUSG00000029352  | 1301.62         | 9556.74       |
| Plekhs1       | -20.0       | 6.7E-24    | ENSMUSG00000035818  | 0.44            | 6.50          | Pgm5          | -9.6        | 2E-33      | ENSMUSG00000041731  | 3.00            | 21.79         |
| Myo18b        | -19.6       | 1.4E-22    | ENSMUSG00000072720  | 0.29            | 4.23          | Scgn          | -9.5        | 1.1E-23    | ENSMUSG00000021337  | 0.69            | 5.22          |
| Slc24a4       | -19.2       | 1E-28      | ENSMUSG00000041771  | 1.46            | 21.32         | Cela1         | -9.3        | 1.3E-61    | ENSMUSG00000023031  | 10.47           | 74.85         |
| Gcg           | -18.7       | 4.6E-44    | ENSMUSG00000000394  | 1.45            | 19.19         | Fgfr3         | -9.3        | 3.8E-55    | ENSMUSG00000054252  | 5.26            | 37.60         |
| Myo7b         | -18.2       | 1.9E-18    | ENSMUSG00000024388  | 0.49            | 6.71          | Hfe           | -9.3        | 8.6E-25    | ENSMUSG00000006611  | 2.12            | 14.78         |
| Wnt7a         | -17.5       | 1.3E-24    | ENSMUSG00000030093  | 1.31            | 17.08         | Gsn           | -9.2        | 3.9E-45    | ENSMUSG00000026879  | 29.53           | 210.46        |
| Bcmo1         | -16.7       | 1.9E-25    | ENSMUSG00000031845  | 0.27            | 3.35          | Nol3          | -8.9        | 1.2E-38    | ENSMUSG00000014776  | 1.39            | 9.21          |
| 1700080G11Rik | -16.5       | 7.7E-10    | ENSMUSG00000086771  | 0.15            | 2.53          | Dync1i1       | -8.7        | 1.4E-20    | ENSMUSG00000029757  | 0.94            | 6.07          |
| Crygs         | -16.0       | 8E-35      | ENSMUSG00000033501  | 18.08           | 220.23        | Griffin       | -8.5        | 3.8E-51    | ENSMUSG00000036586  | 40.47           | 263.22        |
| Gm26847       | -15.9       | 8.1E-46    | ENSMUSG00000097526  | 12.78           | 156.15        | Mtnr1a        | -8.4        | 8.9E-32    | ENSMUSG00000054764  | 1.91            | 12.17         |
| Cryga         | -15.8       | 5.2E-31    | ENSMUSG00000044429  | 1003.75         | 12221.23      | Myh7b         | -8.4        | 8.2E-32    | ENSMUSG00000074652  | 1.23            | 7.86          |
| St18          | -15.7       | 3.8E-38    | ENSMUSG00000033740  | 0.20            | 2.22          | Gm15417       | -8.2        | 7.2E-09    | ENSMUSG00000074466  | 1.21            | 7.50          |
| Snx22         | -15.6       | 1E-16      | ENSMUSG00000039452  | 1.12            | 13.06         | Capn3         | -8.0        | 9.8E-56    | ENSMUSG00000079110  | 224.71          | 1401.46       |
| Cryba2        | -15.6       | 4.9E-46    | ENSMUSG00000006546  | 382.22          | 4600.10       | Gstp2         | -7.9        | 1E-12      | ENSMUSG00000038155  | 1.43            | 8.34          |
| S100a4        | -15.4       | 6.7E-14    | ENSMUSG00000001020  | 1.68            | 17.59         | Gadd45b       | -7.9        | 6.5E-12    | ENSMUSG00000015312  | 1.29            | 7.46          |
| Chrng         | -15.3       | 1.9E-41    | ENSMUSG00000026253  | 5.24            | 61.97         | Tdrd7         | -7.8        | 4.5E-42    | ENSMUSG00000035517  | 59.33           | 354.57        |
| Cryba4        | -14.8       | 5.8E-37    | ENSMUSG000000066975 | 896.00          | 10270.19      | Trpc6         | -7.8        | 2.4E-26    | ENSMUSG000000031997 | 3.36            | 19.73         |
| Syn2          | -14.8       | 1.9E-57    | ENSMUSG00000009394  | 0.82            | 8.99          | Poln          | -7.6        | 7.5E-13    | ENSMUSG00000045102  | 0.39            | 2.16          |
| Crygc         | -14.6       | 4.6E-35    | ENSMUSG00000025952  | 340.35          | 3804.70       | Lgi2          | -7.5        | 7.6E-37    | ENSMUSG00000039252  | 6.68            | 38.45         |
| 1500009C09Rik | -13.7       | 3.7E-33    | ENSMUSG00000068099  | 0.61            | 5.75          | Spta1         | -7.5        | 1.4E-38    | ENSMUSG00000026532  | 0.50            | 2.88          |
| Prox1os       | -13.6       | 1.1E-48    | ENSMUSG00000079045  | 6.81            | 70.17         | Nrcam         | -7.4        | 2E-38      | ENSMUSG00000020598  | 9.31            | 53.58         |
| Sec14l5       | -13.6       | 7.6E-37    | ENSMUSG00000091712  | 0.54            | 4.97          | Crygn         | -7.4        | 1.6E-44    | ENSMUSG00000038135  | 535.02          | 3026.93       |
| Cryge         | -13.5       | 5.1E-38    | ENSMUSG00000070870  | 1025.95         | 10704.19      | Slc46a3       | -7.3        | 3.3E-19    | ENSMUSG00000029650  | 1.52            | 8.31          |
| Rspo1         | -13.5       | 7.1E-79    | ENSMUSG00000028871  | 4.59            | 47.02         | Akap14        | -7.1        | 5.1E-22    | ENSMUSG00000036551  | 0.93            | 4.99          |
| Mip           | -13.4       | 7.5E-45    | ENSMUSG00000025389  | 159.97          | 1657.29       | Pip5k1l       | -7.0        | 8E-86      | ENSMUSG00000046854  | 5.34            | 29.05         |
| Bmper         | -12.9       | 7E-40      | ENSMUSG00000031963  | 4.19            | 41.69         | Unc13c        | -7.0        | 6.6E-19    | ENSMUSG00000062151  | 0.62            | 3.23          |
| Pla2g7        | -12.6       | 2.9E-24    | ENSMUSG00000023913  | 16.92           | 162.56        | Epn3          | -6.9        | 2.8E-39    | ENSMUSG00000010080  | 0.72            | 3.83          |
| Ermap         | -12.4       | 1.1E-24    | ENSMUSG00000028644  | 0.71            | 6.54          | Osbp2         | -6.8        | 3.6E-54    | ENSMUSG00000020435  | 6.72            | 35.42         |
| Lyzl4         | -12.3       | 3.1E-39    | ENSMUSG00000032530  | 1.21            | 10.96         | Tmem252       | -6.8        | 1E-19      | ENSMUSG00000048572  | 1.46            | 7.40          |
| Gje1          | -12.0       | 2.6E-45    | ENSMUSG00000019867  | 3.93            | 35.61         | Gls2          | -6.7        | 4.1E-22    | ENSMUSG00000044005  | 0.43            | 2.25          |
| Hsf4          | -11.7       | 1.6E-41    | ENSMUSG00000033249  | 7.13            | 63.67         | Cend1         | -6.7        | 9.8E-25    | ENSMUSG00000060240  | 1.18            | 5.77          |
| Crybb1        | -11.6       | 8E-49      | ENSMUSG00000029343  | 2318.10         | 20757.30      | Stx11         | -6.4        | 1.7E-05    | ENSMUSG00000039232  | 0.76            | 3.66          |

| feature ID    | fold change | FDR Pvalue | ensembl gene id    | Prox1 rpkm mean | C57 rpkm mean | feature ID | fold change | FDR Pvalue | ensembl gene id    | Prox1 rpkm mean | C57 rpkm mean |
|---------------|-------------|------------|--------------------|-----------------|---------------|------------|-------------|------------|--------------------|-----------------|---------------|
| Zbtb7b        | -6.5        | 4.9E-11    | ENSMUSG00000028042 | 2.03            | 9.93          | Fn3krp     | -4.9        | 9E-33      | ENSMUSG00000039253 | 13.59           | 51.36         |
| Pla2g16       | -6.4        | 1.7E-23    | ENSMUSG00000060675 | 12.55           | 61.54         | Rab42      | -4.9        | 2.9E-09    | ENSMUSG00000089687 | 0.88            | 3.87          |
| Gm11427       | -6.3        | 3.7E-11    | ENSMUSG00000083161 | 0.54            | 2.74          | Ogn        | -4.9        | 8.4E-13    | ENSMUSG00000021390 | 2.81            | 10.42         |
| Rsph10b       | -6.3        | 1.4E-12    | ENSMUSG00000075569 | 0.67            | 3.17          | Rnf180     | -4.8        | 6.4E-06    | ENSMUSG00000021720 | 2.50            | 8.98          |
| Lingo3        | -6.2        | 3.6E-32    | ENSMUSG00000051067 | 0.92            | 4.47          | Prkaa2     | -4.7        | 3.6E-25    | ENSMUSG00000028518 | 2.52            | 9.12          |
| RP23-380A10.3 | -6.2        | 3.4E-06    | NA                 | 0.45            | 2.00          | Hist1h2bc  | -4.7        | 3.8E-35    | ENSMUSG00000018102 | 16.19           | 58.74         |
| Cryaa         | -6.2        | 4E-42      | ENSMUSG00000024041 | 15055.37        | 71641.20      | Cyb5r2     | -4.7        | 7.1E-12    | ENSMUSG00000048065 | 0.65            | 2.31          |
| Prkca         | -6.2        | 1.8E-35    | ENSMUSG00000050965 | 1.77            | 8.31          | Rnf19b     | -4.7        | 6.8E-30    | ENSMUSG00000028793 | 10.89           | 38.89         |
| Pygm          | -6.1        | 2.7E-48    | ENSMUSG00000032648 | 22.49           | 106.00        | Fam46c     | -4.6        | 1.1E-29    | ENSMUSG00000044468 | 25.12           | 90.13         |
| Thsd4         | -6.1        | 1.3E-11    | ENSMUSG00000032289 | 1.24            | 5.76          | Ace        | -4.6        | 2.5E-22    | ENSMUSG00000020681 | 0.74            | 2.58          |
| R3hdml        | -6.0        | 2.7E-18    | ENSMUSG00000078949 | 6.20            | 28.28         | Qpct       | -4.5        | 1.6E-22    | ENSMUSG00000024084 | 3.99            | 13.99         |
| Akr1b8        | -6.0        | 9.3E-22    | ENSMUSG00000029762 | 1.10            | 5.39          | Entpd1     | -4.5        | 4.5E-32    | ENSMUSG00000048120 | 3.85            | 13.38         |
| Cpeb3         | -5.9        | 6.8E-14    | ENSMUSG00000039652 | 0.46            | 2.02          | Vit        | -4.5        | 9.6E-43    | ENSMUSG00000024076 | 77.18           | 270.98        |
| Zmat4         | -5.9        | 1.3E-18    | ENSMUSG00000037492 | 0.71            | 3.15          | Ndrp4      | -4.5        | 5.3E-48    | ENSMUSG00000036564 | 4.42            | 15.31         |
| Kcnma1        | -5.8        | 4.8E-31    | ENSMUSG00000063142 | 0.89            | 3.86          | Tnfrsf23   | -4.5        | 8.6E-20    | ENSMUSG00000037613 | 1.28            | 4.32          |
| Lin7a         | -5.8        | 1.2E-50    | ENSMUSG00000019906 | 4.10            | 18.34         | Gm11961    | -4.5        | 4.8E-12    | ENSMUSG00000056288 | 1.53            | 5.39          |
| Rcan2         | -5.8        | 2E-36      | ENSMUSG00000039601 | 2.01            | 8.75          | Pstpip2    | -4.5        | 6E-08      | ENSMUSG00000025429 | 1.27            | 4.16          |
| Pon2          | -5.8        | 1.1E-38    | ENSMUSG00000032667 | 14.97           | 66.29         | Rgs8       | -4.5        | 3E-51      | ENSMUSG00000042671 | 6.33            | 21.93         |
| Cd24a         | -5.7        | 1.2E-40    | ENSMUSG00000047139 | 342.95          | 1517.01       | Cnih2      | -4.4        | 9.7E-40    | ENSMUSG00000024873 | 10.49           | 36.04         |
| Stat5a        | -5.7        | 4.7E-28    | ENSMUSG00000040403 | 0.85            | 3.65          | Gpr19      | -4.4        | 1.2E-37    | ENSMUSG00000032641 | 5.07            | 17.33         |
| Gm14005       | -5.6        | 4.4E-09    | ENSMUSG00000074813 | 0.62            | 2.63          | Itpk1      | -4.4        | 4E-34      | ENSMUSG00000057963 | 5.66            | 19.17         |
| Nyap1         | -5.5        | 3.6E-57    | ENSMUSG00000045348 | 11.28           | 48.42         | Itga2      | -4.4        | 1.6E-13    | ENSMUSG00000015533 | 1.69            | 5.69          |
| Fam131a       | -5.5        | 3.1E-36    | ENSMUSG00000050821 | 3.43            | 14.48         | Gprc5b     | -4.4        | 2.4E-35    | ENSMUSG00000008734 | 19.39           | 65.84         |
| Add2          | -5.4        | 1.1E-33    | ENSMUSG00000030000 | 5.99            | 24.93         | Fgfr1      | -4.4        | 2.1E-28    | ENSMUSG00000008090 | 14.83           | 50.00         |
| Arntl2        | -5.4        | 7.5E-29    | ENSMUSG00000040187 | 1.39            | 5.68          | Dner       | -4.4        | 4.4E-11    | ENSMUSG00000036766 | 1.56            | 5.17          |
| Espn          | -5.3        | 8.9E-44    | ENSMUSG00000028943 | 1.52            | 6.18          | Sptb       | -4.4        | 1E-19      | ENSMUSG00000021061 | 19.31           | 65.48         |
| Arhgdig       | -5.3        | 5.3E-23    | ENSMUSG00000073433 | 0.88            | 3.59          | Map6d1     | -4.3        | 1E-27      | ENSMUSG00000041205 | 2.53            | 8.41          |
| Ptgrfr        | -5.3        | 8.1E-17    | ENSMUSG00000028036 | 2.54            | 10.28         | Dbnl       | -4.3        | 1E-36      | ENSMUSG00000020476 | 59.24           | 198.23        |
| Htatif2       | -5.3        | 6.7E-10    | ENSMUSG00000039745 | 0.74            | 2.71          | Jazf1      | -4.3        | 1E-52      | ENSMUSG00000063568 | 6.48            | 21.77         |
| Efcab10       | -5.2        | 3.3E-06    | ENSMUSG00000020562 | 0.58            | 2.58          | S1pr5      | -4.3        | 1.5E-17    | ENSMUSG00000045087 | 1.32            | 4.35          |
| 2900005J15Rik | -5.2        | 1.1E-11    | ENSMUSG00000043833 | 0.78            | 3.21          | Btbd17     | -4.3        | 7.7E-40    | ENSMUSG00000000202 | 5.19            | 17.26         |
| B230312C02Rik | -5.2        | 4.4E-42    | ENSMUSG00000084843 | 7.32            | 29.36         | Hist2h3c2  | -4.2        | 1.1E-09    | ENSMUSG00000081058 | 1.12            | 3.51          |
| Gm17586       | -5.2        | 2E-32      | ENSMUSG00000097062 | 18.44           | 73.00         | Magi2_1    | -4.2        | 1.1E-07    | NA                 | 0.77            | 2.46          |
| Gja3          | -5.2        | 5.5E-38    | ENSMUSG00000048582 | 69.21           | 274.68        | Tex2       | -4.2        | 8.8E-26    | ENSMUSG00000040548 | 5.42            | 17.49         |
| Lsamp         | -5.1        | 3.7E-22    | ENSMUSG00000061080 | 1.08            | 4.28          | Snhg12     | -4.2        | 1.6E-17    | ENSMUSG00000086290 | 21.58           | 68.97         |
| Gss           | -5.1        | 3.4E-30    | ENSMUSG00000027610 | 6.90            | 27.08         | Adc        | -4.2        | 1.1E-20    | ENSMUSG00000028789 | 3.64            | 11.57         |
| Zfp185        | -5.1        | 1.1E-49    | ENSMUSG00000031351 | 12.06           | 47.51         | Tob1       | -4.1        | 3.2E-24    | ENSMUSG00000037573 | 39.37           | 125.10        |
| Nkg7          | -5.1        | 2.7E-08    | ENSMUSG00000004612 | 0.52            | 2.11          | Cdkl2      | -4.1        | 2.8E-20    | ENSMUSG00000029403 | 0.98            | 3.07          |
| Mlboat1       | -5.0        | 4.9E-41    | ENSMUSG00000038732 | 11.52           | 44.52         | Abtb2      | -4.1        | 3E-19      | ENSMUSG00000032724 | 3.73            | 11.59         |
| Rnaset2b      | -5.0        | 1.3E-23    | ENSMUSG00000094724 | 1.80            | 6.87          | Reep1      | -4.0        | 4.6E-37    | ENSMUSG00000052852 | 12.02           | 37.56         |
| Paqr7         | -5.0        | 6.9E-31    | ENSMUSG00000037348 | 2.00            | 7.67          | Adra2a     | -4.0        | 4.9E-19    | ENSMUSG00000033717 | 0.91            | 2.78          |
| Synm          | -5.0        | 9.5E-23    | ENSMUSG00000030554 | 10.57           | 40.79         | Metap1     | -4.0        | 2.3E-29    | ENSMUSG00000005813 | 33.44           | 103.99        |
| Gstp1         | -5.0        | 5.5E-30    | ENSMUSG00000060803 | 52.86           | 202.87        | Optn       | -4.0        | 1.4E-10    | ENSMUSG00000026672 | 4.45            | 13.59         |
| Clgn          | -5.0        | 9.2E-31    | ENSMUSG00000002190 | 1.24            | 4.76          | Teclr      | -4.0        | 3.5E-07    | ENSMUSG00000049537 | 0.85            | 2.66          |
| Sqrdl         | -5.0        | 1.9E-27    | ENSMUSG00000005803 | 1.21            | 4.57          | Stk39      | -4.0        | 1.3E-36    | ENSMUSG00000027030 | 19.00           | 59.09         |
| Sorbs1        | -5.0        | 2.1E-20    | ENSMUSG00000025006 | 4.65            | 17.79         | Fam46b     | -4.0        | 0.00012    | ENSMUSG00000046694 | 0.84            | 2.54          |
| Aldoc         | -5.0        | 3.6E-28    | ENSMUSG00000017390 | 2.27            | 8.52          | Kif1a      | -4.0        | 1.3E-13    | ENSMUSG00000014602 | 14.51           | 44.61         |
| Hebp2         | -5.0        | 1.9E-44    | ENSMUSG00000019853 | 5.02            | 19.03         | Pmp22      | -4.0        | 1.1E-27    | ENSMUSG00000018217 | 24.44           | 74.78         |
| Wnt7b         | -5.0        | 4.7E-22    | ENSMUSG00000022382 | 13.42           | 50.96         | Cyyr1      | -4.0        | 1.2E-16    | ENSMUSG00000041134 | 4.04            | 12.34         |
| Metrl         | -4.9        | 1E-35      | ENSMUSG00000039208 | 7.34            | 27.71         | Clu        | -3.9        | 1.9E-23    | ENSMUSG00000022037 | 30.72           | 93.71         |

| feature ID | fold change | FDR Pvalue | ensembl gene id    | Prox1 rpkm mean | C57 rpkm mean | feature ID    | fold change | FDR Pvalue | ensembl gene id     | Prox1 rpkm mean | C57 rpkm mean |
|------------|-------------|------------|--------------------|-----------------|---------------|---------------|-------------|------------|---------------------|-----------------|---------------|
| Ctnna2     | -3.9        | 4E-42      | ENSMUSG00000063063 | 2.34            | 7.13          | Arvcf         | -3.2        | 4E-24      | ENSMUSG00000000325  | 19.17           | 46.55         |
| Id2        | -3.9        | 3.7E-45    | ENSMUSG00000020644 | 60.12           | 183.57        | Kcnc4         | -3.2        | 1.3E-25    | ENSMUSG00000028631  | 2.52            | 6.09          |
| Gck        | -3.9        | 2.5E-36    | ENSMUSG00000041798 | 5.95            | 18.14         | Adamts18      | -3.2        | 5.5E-29    | ENSMUSG00000053399  | 22.87           | 56.15         |
| Vwa5a      | -3.9        | 3E-24      | ENSMUSG00000023186 | 9.90            | 29.97         | Tmem9b        | -3.2        | 4.1E-25    | ENSMUSG00000031021  | 17.04           | 41.75         |
| Gpr137b-ps | -3.9        | 5.9E-11    | ENSMUSG00000097715 | 1.28            | 3.72          | Rpl34         | -3.2        | 6.2E-06    | ENSMUSG00000062006  | 35.79           | 87.59         |
| Mturn      | -3.9        | 4.4E-25    | ENSMUSG00000038065 | 7.59            | 22.69         | Blvra         | -3.1        | 3.3E-14    | ENSMUSG00000001999  | 2.81            | 6.74          |
| Casp7      | -3.9        | 8.4E-19    | ENSMUSG00000025076 | 14.37           | 42.48         | B3gnt5        | -3.1        | 5.6E-22    | ENSMUSG00000022686  | 19.42           | 46.86         |
| Tppp3      | -3.9        | 7.4E-39    | ENSMUSG00000014846 | 7.65            | 22.95         | Tbc1d22a      | -3.1        | 1.6E-18    | ENSMUSG00000051864  | 10.67           | 25.51         |
| Rnf113a1   | -3.8        | 4.8E-09    | ENSMUSG00000036537 | 25.74           | 74.72         | Gm11837       | -3.1        | 1.3E-10    | ENSMUSG00000086587  | 5.76            | 13.68         |
| Dock5      | -3.8        | 5E-19      | ENSMUSG00000044447 | 9.10            | 27.10         | Adamts14      | -3.1        | 8.2E-09    | ENSMUSG00000015850  | 3.07            | 7.23          |
| Ndufs5     | -3.8        | 9.2E-13    | ENSMUSG00000028648 | 4.74            | 13.92         | Cars          | -3.1        | 4.7E-20    | ENSMUSG00000010755  | 13.63           | 32.32         |
| Il18       | -3.8        | 5.7E-08    | ENSMUSG00000039217 | 1.47            | 4.41          | Slain1        | -3.1        | 2.5E-31    | ENSMUSG00000055717  | 6.06            | 14.59         |
| Fibin      | -3.7        | 0.0001     | ENSMUSG00000074971 | 2.05            | 5.80          | Gpr137b       | -3.1        | 2.1E-22    | ENSMUSG00000021306  | 46.74           | 110.92        |
| Mocs2      | -3.7        | 1E-23      | ENSMUSG00000015536 | 8.37            | 23.91         | Nudt22        | -3.1        | 1.4E-15    | ENSMUSG00000037349  | 7.39            | 17.53         |
| Tsc2       | -3.7        | 2.5E-15    | ENSMUSG00000002496 | 22.41           | 63.47         | Rexo2         | -3.0        | 2.8E-21    | ENSMUSG00000032026  | 35.97           | 84.09         |
| Syt5       | -3.7        | 7E-12      | ENSMUSG00000004961 | 1.82            | 5.08          | Gm14295       | -3.0        | 1E-10      | ENSMUSG00000078877  | 1.12            | 2.63          |
| Prkg2      | -3.7        | 1.8E-32    | ENSMUSG00000028944 | 6.96            | 19.74         | Fgfbp3        | -3.0        | 7.7E-14    | ENSMUSG00000047632  | 5.43            | 12.72         |
| Rfx8       | -3.7        | 5.8E-09    | ENSMUSG00000057173 | 0.83            | 2.26          | Rasl11b       | -3.0        | 1.5E-25    | ENSMUSG00000049907  | 54.36           | 126.61        |
| Sptbn1     | -3.7        | 1.4E-19    | ENSMUSG00000020315 | 32.36           | 92.67         | Kif26b        | -3.0        | 0.00017    | ENSMUSG00000026494  | 0.96            | 2.22          |
| Rilpl1     | -3.7        | 1E-35      | ENSMUSG00000029392 | 28.59           | 81.06         | Ddx26b        | -3.0        | 1.2E-20    | ENSMUSG00000035967  | 32.33           | 74.76         |
| Kcnj11     | -3.6        | 9.5E-12    | ENSMUSG00000096146 | 2.65            | 7.43          | Lnp           | -3.0        | 2.1E-19    | ENSMUSG00000009207  | 7.04            | 16.12         |
| Serpinc6b  | -3.6        | 1.8E-08    | ENSMUSG00000042842 | 0.95            | 2.59          | Cttnbp2       | -3.0        | 1.2E-19    | ENSMUSG00000000416  | 2.17            | 4.95          |
| Tubb2a     | -3.6        | 3.7E-31    | ENSMUSG00000058672 | 17.02           | 47.80         | Hlcs          | -3.0        | 1.7E-25    | ENSMUSG00000040820  | 9.44            | 21.66         |
| Efcab1     | -3.6        | 1.5E-35    | ENSMUSG00000068617 | 12.03           | 33.77         | Pnpla6        | -2.9        | 1.3E-39    | ENSMUSG00000004565  | 9.58            | 21.92         |
| Abcc8      | -3.6        | 1.7E-28    | ENSMUSG00000040136 | 3.22            | 9.07          | Cbs           | -2.9        | 2.5E-11    | ENSMUSG00000024039  | 0.88            | 2.03          |
| Gpm6b      | -3.6        | 3.6E-14    | ENSMUSG00000031342 | 4.88            | 13.42         | Sntb1         | -2.9        | 3E-11      | ENSMUSG00000060429  | 6.46            | 14.50         |
| Cpne7      | -3.6        | 6.8E-16    | ENSMUSG00000034796 | 0.97            | 2.71          | Pbx4          | -2.9        | 2.4E-14    | ENSMUSG000000031860 | 2.34            | 5.40          |
| Nap114     | -3.6        | 2E-31      | ENSMUSG00000059119 | 236.18          | 653.88        | Adam9         | -2.9        | 1.1E-25    | ENSMUSG00000031555  | 20.73           | 46.22         |
| Gadd45g    | -3.5        | 6E-13      | ENSMUSG00000021453 | 9.36            | 25.26         | Gas6          | -2.9        | 1.6E-16    | ENSMUSG00000031451  | 8.10            | 17.78         |
| Cpeb2      | -3.5        | 4.3E-23    | ENSMUSG00000039782 | 5.21            | 14.14         | Ppip5k2       | -2.9        | 8.1E-28    | ENSMUSG00000040648  | 8.31            | 18.41         |
| Map6       | -3.5        | 3.7E-43    | ENSMUSG00000055407 | 6.19            | 16.82         | Zfp385a       | -2.8        | 6E-32      | ENSMUSG00000000552  | 34.12           | 75.71         |
| Osblp11    | -3.5        | 7.5E-29    | ENSMUSG00000022807 | 14.83           | 39.87         | Insig1        | -2.8        | 2.8E-28    | ENSMUSG000000045294 | 31.09           | 68.61         |
| Ptplad2    | -3.5        | 1.2E-24    | ENSMUSG00000028497 | 4.69            | 12.53         | Igsf9         | -2.8        | 2.4E-21    | ENSMUSG00000037995  | 18.84           | 41.24         |
| Cpeb1      | -3.4        | 4.5E-34    | ENSMUSG00000025586 | 6.15            | 16.32         | Nabp1         | -2.8        | 2.9E-14    | ENSMUSG00000026107  | 2.85            | 6.22          |
| Bpnt1      | -3.4        | 2.3E-43    | ENSMUSG00000026617 | 14.22           | 37.85         | Peli1         | -2.8        | 4.1E-24    | ENSMUSG00000020134  | 13.36           | 29.19         |
| Dgkg       | -3.4        | 1.8E-10    | ENSMUSG00000022861 | 0.80            | 2.06          | E530001K10Rik | -2.8        | 6.2E-08    | ENSMUSG00000075020  | 4.82            | 10.40         |
| Elf2       | -3.4        | 1.7E-26    | ENSMUSG00000001542 | 52.22           | 137.46        | Gls           | -2.8        | 2.6E-21    | ENSMUSG00000026103  | 12.27           | 26.70         |
| Atp8a1     | -3.4        | 1.6E-14    | ENSMUSG00000037685 | 1.48            | 3.87          | Gm13152       | -2.8        | 6.3E-09    | ENSMUSG00000078496  | 4.28            | 9.30          |
| Pde2a      | -3.3        | 6.3E-11    | ENSMUSG00000030653 | 8.34            | 21.23         | Gm5607        | -2.8        | 4.7E-19    | ENSMUSG00000047935  | 7.36            | 15.96         |
| Fxyd1      | -3.3        | 2.6E-08    | ENSMUSG00000036570 | 2.85            | 7.36          | Aldh1a7       | -2.8        | 7.2E-20    | ENSMUSG00000024747  | 40.36           | 87.36         |
| Dnmbp      | -3.3        | 7.8E-20    | ENSMUSG00000025195 | 9.66            | 24.52         | Snap91        | -2.8        | 1.6E-19    | ENSMUSG00000033419  | 2.08            | 4.50          |
| Nexn       | -3.3        | 1.2E-18    | ENSMUSG00000039103 | 3.19            | 8.08          | Sardh         | -2.8        | 6.8E-07    | ENSMUSG00000009614  | 1.01            | 2.16          |
| Ngef       | -3.3        | 4.5E-30    | ENSMUSG00000026259 | 4.55            | 11.50         | C2cd2l        | -2.8        | 5.8E-29    | ENSMUSG000000032120 | 5.37            | 11.66         |
| Herc4      | -3.2        | 2.7E-28    | ENSMUSG00000020064 | 32.19           | 80.77         | Scamp5        | -2.8        | 1.6E-11    | ENSMUSG00000040722  | 7.57            | 16.15         |
| Rnf123     | -3.2        | 8.6E-27    | ENSMUSG00000041528 | 6.21            | 15.53         | Megf9         | -2.8        | 6E-14      | ENSMUSG00000039270  | 15.45           | 33.12         |
| Lymr1      | -3.2        | 2.2E-12    | ENSMUSG00000030922 | 2.48            | 6.24          | Dnajb2        | -2.8        | 3.6E-18    | ENSMUSG00000026203  | 9.49            | 20.34         |
| Pdim1      | -3.2        | 1.7E-13    | ENSMUSG00000055044 | 3.32            | 8.13          | Hmgn3         | -2.8        | 6.4E-11    | ENSMUSG00000066456  | 34.04           | 72.23         |
| Rab3b      | -3.2        | 1.8E-19    | ENSMUSG00000003411 | 2.55            | 6.33          | Mecr          | -2.8        | 2.9E-22    | ENSMUSG00000028910  | 7.13            | 15.31         |
| Rnaset2a   | -3.2        | 9.7E-09    | ENSMUSG00000095687 | 1.61            | 4.06          | Sowaha        | -2.8        | 7.6E-22    | ENSMUSG00000044352  | 14.99           | 32.44         |
| Nacc2      | -3.2        | 2E-16      | ENSMUSG00000026932 | 2.08            | 5.07          | Mob3b         | -2.8        | 1.2E-16    | ENSMUSG00000073910  | 3.08            | 6.54          |

| feature ID    | fold change | FDR Pvalue | ensembl gene id    | Prox1 rpkm mean | C57 rpkm mean | feature ID    | fold change | FDR Pvalue | ensembl gene id    | Prox1 rpkm mean | C57 rpkm mean |
|---------------|-------------|------------|--------------------|-----------------|---------------|---------------|-------------|------------|--------------------|-----------------|---------------|
| Sptan1        | -2.8        | 4.7E-22    | ENSMUSG00000057738 | 65.64           | 140.46        | Mettl22       | -2.6        | 3.2E-13    | ENSMUSG00000039345 | 3.10            | 6.24          |
| Dst           | -2.7        | 1.6E-06    | ENSMUSG00000026131 | 6.80            | 14.68         | Ncoa7         | -2.6        | 1.8E-15    | ENSMUSG00000039697 | 7.08            | 14.23         |
| Efcab2        | -2.7        | 2.7E-14    | ENSMUSG00000026495 | 5.04            | 10.57         | C77080        | -2.6        | 1.4E-20    | ENSMUSG00000050390 | 8.67            | 17.45         |
| Klhl5         | -2.7        | 4.5E-20    | ENSMUSG00000054920 | 5.85            | 12.29         | Rbp3          | -2.6        | 7.9E-13    | ENSMUSG00000041534 | 5.42            | 10.79         |
| Zbtb8b        | -2.7        | 1.3E-24    | ENSMUSG00000048485 | 7.08            | 15.03         | Spg20         | -2.6        | 1.1E-22    | ENSMUSG00000036580 | 19.89           | 39.91         |
| Ipo8          | -2.7        | 2.2E-22    | ENSMUSG00000040029 | 9.64            | 20.52         | Slc25a22      | -2.6        | 1.2E-11    | ENSMUSG00000019082 | 4.38            | 8.76          |
| Reep2         | -2.7        | 1.8E-28    | ENSMUSG00000038555 | 12.41           | 26.31         | Trim9         | -2.6        | 1.3E-23    | ENSMUSG00000021071 | 5.85            | 11.71         |
| Kcnj12        | -2.7        | 2.9E-24    | ENSMUSG00000042529 | 10.15           | 21.47         | Eno3          | -2.6        | 3.7E-25    | ENSMUSG00000060600 | 23.84           | 47.99         |
| Prx           | -2.7        | 6.6E-18    | ENSMUSG00000053198 | 13.87           | 29.09         | Tubb6         | -2.6        | 2.4E-22    | ENSMUSG00000001473 | 32.95           | 65.97         |
| Fah           | -2.7        | 8.3E-09    | ENSMUSG00000030630 | 1.35            | 2.87          | Mllt11        | -2.6        | 6.2E-08    | ENSMUSG00000053192 | 2.64            | 5.22          |
| Nedd4l        | -2.7        | 3.3E-19    | ENSMUSG00000024589 | 2.52            | 5.28          | 9930104L06Rik | -2.6        | 7.9E-20    | ENSMUSG00000044730 | 3.71            | 7.41          |
| Vldlr         | -2.7        | 2.3E-17    | ENSMUSG00000024924 | 7.24            | 15.08         | Gm14296       | -2.6        | 8E-17      | ENSMUSG00000074527 | 2.04            | 4.06          |
| Cpt2          | -2.7        | 5.7E-17    | ENSMUSG00000028607 | 15.80           | 32.74         | Spink13       | -2.6        | 0.01804    | ENSMUSG00000073551 | 2.41            | 4.69          |
| Prkab2        | -2.7        | 2.5E-15    | ENSMUSG00000038205 | 7.45            | 15.35         | Epb4.1l4a     | -2.6        | 5.3E-22    | ENSMUSG00000024376 | 40.29           | 79.89         |
| Pcsk6         | -2.7        | 3.6E-08    | ENSMUSG00000030513 | 1.74            | 3.53          | Rhot1         | -2.6        | 5.2E-15    | ENSMUSG00000017686 | 8.28            | 16.29         |
| Ass1          | -2.7        | 5.1E-14    | ENSMUSG00000076441 | 4.36            | 8.88          | Osgin2        | -2.6        | 3.9E-17    | ENSMUSG00000041153 | 4.46            | 8.83          |
| Cyp7b1        | -2.7        | 1E-10      | ENSMUSG00000039519 | 3.00            | 6.14          | Dnajb1        | -2.6        | 5E-10      | ENSMUSG00000005483 | 28.72           | 56.13         |
| Mthfd1l       | -2.6        | 1.5E-27    | ENSMUSG00000040675 | 14.37           | 29.63         | Slc38a5       | -2.5        | 5.8E-06    | ENSMUSG00000031170 | 1.02            | 2.05          |
| Gpx1          | -2.6        | 8.9E-19    | ENSMUSG00000063856 | 165.58          | 337.66        | Mapk8ip1      | -2.5        | 4.3E-24    | ENSMUSG00000027223 | 8.88            | 17.51         |
| Uchl1         | -2.6        | 4.1E-18    | ENSMUSG00000029223 | 57.91           | 117.93        | Fktn          | -2.5        | 9.6E-19    | ENSMUSG00000028414 | 11.92           | 23.47         |
| Eif2s3y       | -2.6        | 1.4E-06    | ENSMUSG00000069049 | 6.74            | 13.57         | Inf2          | -2.5        | 4.8E-07    | ENSMUSG00000037679 | 1.74            | 3.36          |
| A430105I19Rik | -2.6        | 2.3E-23    | ENSMUSG00000045838 | 4.80            | 9.77          | Tdrkh         | -2.5        | 2.9E-21    | ENSMUSG00000041912 | 11.96           | 23.48         |
| Spag5         | -2.6        | 4.2E-23    | ENSMUSG00000002055 | 17.91           | 36.48         | Pkp2          | -2.5        | 2.7E-27    | ENSMUSG00000041957 | 7.07            | 13.91         |
| Cul3          | -2.6        | 1.4E-22    | ENSMUSG00000004364 | 52.92           | 107.96        | Kat2b         | -2.5        | 3.3E-14    | ENSMUSG00000000708 | 4.50            | 8.76          |
| Nudt17        | -2.6        | 3.1E-06    | ENSMUSG00000028100 | 1.18            | 2.50          | Gabrg3        | -2.5        | 3.2E-06    | ENSMUSG00000055026 | 1.06            | 2.03          |
| Me1           | -2.6        | 2.4E-15    | ENSMUSG00000032418 | 4.99            | 10.06         | Mthfs1        | -2.5        | 7.9E-07    | ENSMUSG00000079427 | 1.19            | 2.36          |
| Zfyve21       | -2.6        | 1.6E-21    | ENSMUSG00000021286 | 19.62           | 39.89         | Dpf3          | -2.5        | 2.1E-08    | ENSMUSG00000021221 | 2.28            | 4.37          |
| Gm14326       | -2.6        | 2.6E-05    | ENSMUSG00000078862 | 1.34            | 2.65          | Arhgap31      | -2.5        | 2.8E-07    | ENSMUSG00000022799 | 7.33            | 14.35         |



Supplementary Table 4: Genes up-regulated following Prox1 loss

| feature ID    | fold change | FDR Pvalue | ensembl gene id     | Prox1 mean RPKM | C57 mean RPKM | feature ID    | fold change | FDR Pvalue | ensembl gene id     | Prox1 mean RPKM | C57 mean RPKM |
|---------------|-------------|------------|---------------------|-----------------|---------------|---------------|-------------|------------|---------------------|-----------------|---------------|
| Calb1         | 120.5       | 1.1E-124   | ENSMUSG00000028222  | 11.89           | 0.08          | Lox           | 5.4         | 2.1E-04    | ENSMUSG00000024529  | 13.32           | 1.98          |
| Ppp1r14c      | 67.6        | 1.4E-77    | ENSMUSG00000040653  | 12.28           | 0.14          | Mrc2          | 5.3         | 2.1E-24    | ENSMUSG00000020695  | 21.66           | 3.24          |
| Cngb3         | 55.9        | 2.3E-159   | ENSMUSG000000056494 | 18.91           | 0.26          | Gfra2         | 5.3         | 2.4E-34    | ENSMUSG000000022103 | 13.70           | 2.02          |
| Pde11a        | 49.5        | 2.0E-34    | ENSMUSG000000075270 | 2.01            | 0.03          | Gm11650       | 5.3         | 2.6E-07    | ENSMUSG000000087184 | 2.23            | 0.33          |
| Tnc           | 30.6        | 1.2E-82    | ENSMUSG00000028364  | 55.12           | 1.40          | Slc22a5       | 5.2         | 3.4E-35    | ENSMUSG00000018900  | 14.78           | 2.21          |
| Hpse          | 27.0        | 9.7E-82    | ENSMUSG000000035273 | 11.58           | 0.33          | Kera          | 5.2         | 2.6E-03    | ENSMUSG000000019932 | 8.77            | 1.26          |
| Rgs6          | 20.8        | 7.3E-76    | ENSMUSG000000021219 | 5.46            | 0.21          | Rgs13         | 5.2         | 6.3E-14    | ENSMUSG000000051079 | 15.63           | 2.33          |
| Gm12901       | 18.6        | 2.0E-02    | ENSMUSG000000083720 | 22.89           | 0.93          | Glb1l2        | 5.2         | 3.7E-27    | ENSMUSG000000036395 | 4.35            | 0.65          |
| Sox21         | 18.4        | 3.8E-34    | ENSMUSG000000061517 | 3.51            | 0.15          | Elmod1        | 5.2         | 1.2E-13    | ENSMUSG000000041986 | 3.17            | 0.48          |
| C1qtnf4       | 18.1        | 3.9E-45    | ENSMUSG000000040794 | 21.80           | 0.94          | Krt5          | 5.2         | 3.3E-04    | ENSMUSG000000061527 | 15.57           | 2.42          |
| Prokr1        | 13.4        | 1.6E-60    | ENSMUSG000000049409 | 26.03           | 1.51          | Klhl14        | 5.2         | 1.8E-20    | ENSMUSG000000042514 | 4.10            | 0.62          |
| Klf5          | 12.7        | 4.4E-10    | ENSMUSG000000005148 | 2.05            | 0.12          | Gm21738       | 5.2         | 3.8E-02    | ENSMUSG000000095280 | 43.94           | 7.16          |
| Tlr5          | 12.5        | 9.9E-23    | ENSMUSG000000079164 | 2.11            | 0.13          | Slc11a1       | 5.1         | 1.0E-18    | ENSMUSG000000026177 | 5.44            | 0.84          |
| Slc1a2        | 12.0        | 1.5E-78    | ENSMUSG000000005089 | 7.35            | 0.48          | Kcna5         | 5.0         | 3.3E-11    | ENSMUSG000000045534 | 7.30            | 1.16          |
| Tff2          | 11.9        | 2.7E-11    | ENSMUSG000000024028 | 5.02            | 0.33          | 4930426D05Rik | 5.0         | 1.1E-09    | ENSMUSG000000043168 | 3.46            | 0.54          |
| Slc44a5       | 11.5        | 8.0E-49    | ENSMUSG000000028360 | 4.76            | 0.33          | Smoc2         | 5.0         | 7.1E-04    | ENSMUSG000000023886 | 8.17            | 1.27          |
| Gm5900        | 10.5        | 5.5E-11    | ENSMUSG000000094685 | 3.23            | 0.24          | Vcan          | 4.9         | 4.3E-15    | ENSMUSG000000021614 | 18.68           | 3.04          |
| Ttr           | 10.2        | 2.7E-03    | ENSMUSG000000061808 | 5.00            | 0.40          | Col17a1       | 4.8         | 9.6E-04    | ENSMUSG000000025064 | 2.32            | 0.39          |
| Trac          | 10.1        | 3.0E-07    | ENSMUSG000000076928 | 2.70            | 0.19          | Pdgfc         | 4.7         | 7.0E-13    | ENSMUSG000000028019 | 6.07            | 1.02          |
| Gm15631       | 10.0        | 7.5E-11    | ENSMUSG000000085067 | 3.08            | 0.24          | Bves          | 4.7         | 4.8E-18    | ENSMUSG000000071317 | 6.48            | 1.07          |
| Pxdc1         | 8.5         | 1.4E-30    | ENSMUSG000000021411 | 10.77           | 0.99          | Ahnak         | 4.7         | 2.6E-06    | ENSMUSG000000069833 | 10.79           | 1.86          |
| Smim1         | 7.9         | 3.9E-45    | ENSMUSG000000078350 | 5.10            | 0.51          | Nkain4        | 4.7         | 5.9E-17    | ENSMUSG000000027574 | 10.71           | 1.79          |
| Tnnt3         | 7.7         | 5.7E-15    | ENSMUSG000000061723 | 3.82            | 0.38          | Matn4         | 4.7         | 7.7E-03    | ENSMUSG000000016995 | 4.47            | 0.74          |
| Cxcl14        | 7.7         | 2.0E-17    | ENSMUSG000000021508 | 4.21            | 0.42          | Ramp3         | 4.6         | 4.0E-17    | ENSMUSG000000041046 | 6.87            | 1.16          |
| Cma1          | 7.7         | 3.5E-07    | ENSMUSG000000022225 | 2.03            | 0.21          | Lypd6b        | 4.6         | 3.5E-13    | ENSMUSG000000026765 | 4.15            | 0.70          |
| Depdc7        | 7.6         | 3.4E-15    | ENSMUSG000000027173 | 2.43            | 0.25          | Cx3cl1        | 4.6         | 2.2E-43    | ENSMUSG000000031778 | 94.65           | 15.90         |
| Capn6         | 7.6         | 2.0E-17    | ENSMUSG000000067276 | 11.99           | 1.26          | Tyr           | 4.5         | 3.5E-05    | ENSMUSG000000004651 | 15.38           | 2.73          |
| Ppfbp2        | 7.5         | 1.1E-44    | ENSMUSG000000036528 | 10.21           | 1.08          | Klhdc8a       | 4.5         | 7.5E-13    | ENSMUSG000000042115 | 2.68            | 0.46          |
| Wfikkn2       | 7.2         | 6.7E-35    | ENSMUSG000000044177 | 5.88            | 0.63          | Nfix          | 4.5         | 2.9E-04    | ENSMUSG000000001911 | 2.30            | 0.41          |
| Pltp          | 7.2         | 4.6E-15    | ENSMUSG000000017754 | 11.76           | 1.30          | Osbpl3        | 4.4         | 8.6E-46    | ENSMUSG000000029822 | 12.89           | 2.28          |
| Trim6         | 7.2         | 3.5E-25    | ENSMUSG000000072244 | 8.35            | 0.91          | Hist1h1d      | 4.4         | 1.2E-03    | ENSMUSG000000052565 | 4.88            | 0.86          |
| Krt15         | 7.1         | 3.3E-05    | ENSMUSG000000054146 | 8.79            | 0.97          | Sox9          | 4.4         | 8.8E-28    | ENSMUSG000000000567 | 12.97           | 2.31          |
| Srpx          | 6.6         | 2.1E-22    | ENSMUSG000000090084 | 5.70            | 0.67          | Rlbp1         | 4.4         | 9.0E-07    | ENSMUSG000000039194 | 8.25            | 1.50          |
| Gm10800       | 6.4         | 1.2E-02    | ENSMUSG000000075014 | 956.81          | 124.16        | Dsp           | 4.4         | 1.0E-04    | ENSMUSG000000054889 | 3.32            | 0.61          |
| Itga8         | 6.4         | 2.8E-21    | ENSMUSG000000026768 | 3.40            | 0.42          | Cldn11        | 4.4         | 1.3E-04    | ENSMUSG000000037625 | 4.01            | 0.72          |
| Eln           | 6.4         | 5.4E-04    | ENSMUSG000000029675 | 9.16            | 1.13          | Egfl6         | 4.4         | 1.1E-03    | ENSMUSG000000000402 | 3.86            | 0.69          |
| Phactr1       | 6.2         | 1.2E-21    | ENSMUSG000000054728 | 2.52            | 0.32          | Col8a1        | 4.3         | 6.0E-04    | ENSMUSG000000068196 | 8.19            | 1.53          |
| Tifa          | 6.2         | 2.1E-23    | ENSMUSG000000046688 | 10.42           | 1.31          | Col12a1       | 4.3         | 5.2E-04    | ENSMUSG000000032332 | 10.04           | 1.89          |
| Tshr          | 6.2         | 8.4E-23    | ENSMUSG000000020963 | 5.02            | 0.64          | Agtr2         | 4.3         | 4.8E-03    | ENSMUSG000000068122 | 7.46            | 1.38          |
| Gm10801       | 6.1         | 1.2E-02    | ENSMUSG000000075015 | 269.14          | 36.60         | Fras1         | 4.3         | 7.3E-14    | ENSMUSG000000034687 | 9.69            | 1.80          |
| Col1a1        | 6.1         | 1.2E-05    | ENSMUSG000000001506 | 102.48          | 13.25         | Dusp4         | 4.3         | 3.2E-29    | ENSMUSG000000031530 | 20.67           | 3.72          |
| Mapk4         | 6.1         | 1.3E-37    | ENSMUSG000000024558 | 5.85            | 0.75          | Frem1         | 4.3         | 3.2E-08    | ENSMUSG000000059049 | 2.28            | 0.42          |
| Nnat          | 5.6         | 1.2E-53    | ENSMUSG000000067786 | 40.59           | 5.63          | Kitl          | 4.3         | 3.5E-23    | ENSMUSG000000019966 | 19.30           | 3.60          |
| Nrg1          | 5.6         | 3.6E-12    | ENSMUSG000000029911 | 3.63            | 0.51          | Abcc4         | 4.2         | 9.6E-33    | ENSMUSG000000032849 | 20.38           | 3.78          |
| Col14a1       | 5.6         | 2.8E-04    | ENSMUSG000000022371 | 6.36            | 0.90          | Clec11a       | 4.2         | 1.4E-12    | ENSMUSG000000004473 | 3.71            | 0.69          |
| A930003A15Rik | 5.6         | 6.2E-27    | ENSMUSG000000075330 | 53.49           | 7.37          | Crb1          | 4.2         | 6.6E-12    | ENSMUSG000000063681 | 2.40            | 0.44          |
| Fosl2         | 5.5         | 5.2E-22    | ENSMUSG000000029135 | 4.29            | 0.61          | Slc4a5        | 4.2         | 1.6E-04    | ENSMUSG000000068323 | 8.44            | 1.61          |
| Gprc5a        | 5.5         | 1.3E-14    | ENSMUSG000000046733 | 3.58            | 0.51          | Sema3c        | 4.2         | 3.0E-04    | ENSMUSG000000028780 | 2.74            | 0.51          |
| Pdlim3        | 5.5         | 3.5E-10    | ENSMUSG000000031636 | 3.84            | 0.54          | Fam46a        | 4.2         | 2.0E-09    | ENSMUSG000000032265 | 4.50            | 0.84          |
| Sytl2         | 5.5         | 2.6E-17    | ENSMUSG000000030616 | 2.21            | 0.32          | Ndnf          | 4.1         | 2.2E-16    | ENSMUSG000000049001 | 13.13           | 2.53          |

| feature ID | fold change | FDR Pvalue | ensembl gene id     | Prox1 mean RPKM | C57 mean RPKM | feature ID    | fold change | FDR Pvalue | ensembl gene id    | Prox1 mean RPKM | C57 mean RPKM |
|------------|-------------|------------|---------------------|-----------------|---------------|---------------|-------------|------------|--------------------|-----------------|---------------|
| Fam46a     | 4.2         | 2.0E-09    | ENSMUSG00000032265  | 4.50            | 0.84          | Edaradd       | 3.4         | 9.5E-19    | ENSMUSG00000095105 | 11.46           | 2.63          |
| Ndnf       | 4.1         | 2.2E-16    | ENSMUSG00000049001  | 13.13           | 2.53          | Dct           | 3.4         | 3.8E-04    | ENSMUSG00000022129 | 43.86           | 10.43         |
| Papss2     | 4.1         | 4.1E-12    | ENSMUSG00000024899  | 4.68            | 0.90          | Slc45a2       | 3.4         | 7.6E-04    | ENSMUSG00000022243 | 2.58            | 0.61          |
| Hist1h1b   | 4.1         | 1.6E-02    | ENSMUSG00000058773  | 7.35            | 1.44          | Cacna1g       | 3.4         | 1.7E-04    | ENSMUSG00000020866 | 3.77            | 0.90          |
| Asic2      | 4.1         | 6.3E-12    | ENSMUSG00000020704  | 2.55            | 0.49          | Tmem144       | 3.4         | 6.8E-07    | ENSMUSG00000027956 | 2.56            | 0.60          |
| Spp1       | 4.0         | 6.5E-08    | ENSMUSG00000029304  | 10.54           | 2.03          | Bace2         | 3.3         | 1.3E-04    | ENSMUSG00000040605 | 3.51            | 0.83          |
| Kdelr3     | 4.0         | 4.3E-08    | ENSMUSG00000010830  | 6.36            | 1.24          | Plxnc1        | 3.3         | 2.1E-17    | ENSMUSG00000074785 | 7.03            | 1.67          |
| Osr2       | 4.0         | 3.1E-02    | ENSMUSG00000022330  | 2.86            | 0.57          | Hs3st5        | 3.3         | 3.2E-12    | ENSMUSG00000044499 | 2.48            | 0.58          |
| Postn      | 3.9         | 1.1E-04    | ENSMUSG00000027750  | 8.06            | 1.63          | Col8a2        | 3.3         | 2.1E-04    | ENSMUSG00000056174 | 15.05           | 3.61          |
| Dab2       | 3.9         | 2.6E-21    | ENSMUSG00000022150  | 12.26           | 2.48          | Creb3l1       | 3.3         | 4.8E-04    | ENSMUSG00000027230 | 3.89            | 0.93          |
| Npr3       | 3.9         | 3.8E-15    | ENSMUSG00000022206  | 13.31           | 2.74          | Tmem169       | 3.3         | 7.7E-09    | ENSMUSG00000026188 | 2.61            | 0.62          |
| Clec14a    | 3.9         | 3.1E-25    | ENSMUSG00000045930  | 12.31           | 2.49          | Frk           | 3.3         | 8.6E-07    | ENSMUSG00000019779 | 2.20            | 0.52          |
| Tspan10    | 3.8         | 1.1E-05    | ENSMUSG00000039691  | 10.15           | 2.10          | Nid2          | 3.3         | 4.7E-17    | ENSMUSG00000021806 | 42.06           | 10.28         |
| Fbln5      | 3.8         | 2.3E-03    | ENSMUSG00000021186  | 3.14            | 0.65          | Pqlc2         | 3.3         | 1.1E-14    | ENSMUSG00000028744 | 5.50            | 1.32          |
| Col6a1     | 3.8         | 1.4E-04    | ENSMUSG00000001119  | 17.74           | 3.68          | Aass          | 3.3         | 2.7E-09    | ENSMUSG00000029695 | 3.16            | 0.77          |
| Aqp4       | 3.8         | 1.1E-11    | ENSMUSG00000024411  | 2.65            | 0.54          | Igsf3         | 3.2         | 6.5E-26    | ENSMUSG00000042035 | 22.18           | 5.36          |
| Acta2      | 3.8         | 1.6E-29    | ENSMUSG00000035783  | 20.86           | 4.27          | Mlana         | 3.2         | 4.5E-05    | ENSMUSG00000024806 | 16.25           | 3.97          |
| Lpcat2     | 3.8         | 9.0E-12    | ENSMUSG00000033192  | 2.79            | 0.58          | Krt19         | 3.2         | 1.4E-03    | ENSMUSG00000020911 | 2.77            | 0.67          |
| Col16a1    | 3.8         | 2.2E-04    | ENSMUSG00000040690  | 3.22            | 0.68          | Pdgfrl        | 3.2         | 9.9E-06    | ENSMUSG00000031595 | 2.27            | 0.54          |
| Dcn        | 3.7         | 2.9E-05    | ENSMUSG00000019929  | 37.46           | 7.82          | 493244319Rik  | 3.2         | 7.5E-05    | ENSMUSG00000090336 | 2.78            | 0.68          |
| Col6a2     | 3.7         | 3.8E-04    | ENSMUSG00000020241  | 9.32            | 1.98          | Myof          | 3.2         | 3.0E-05    | ENSMUSG00000048612 | 2.12            | 0.52          |
| Pmel       | 3.7         | 3.0E-04    | ENSMUSG00000025359  | 126.72          | 27.29         | Sfrp2         | 3.2         | 2.3E-16    | ENSMUSG00000027996 | 662.84          | 164.28        |
| Col1a2     | 3.7         | 3.6E-05    | ENSMUSG00000029661  | 49.37           | 10.60         | 2010107G23Rik | 3.2         | 2.3E-15    | ENSMUSG00000020083 | 8.35            | 2.06          |
| Apoc1      | 3.7         | 9.0E-04    | ENSMUSG00000040564  | 2.22            | 0.45          | Satb2         | 3.2         | 5.3E-11    | ENSMUSG00000038331 | 2.03            | 0.50          |
| Wnt6       | 3.7         | 4.1E-02    | ENSMUSG00000033227  | 3.12            | 0.69          | Cdh3          | 3.2         | 1.9E-04    | ENSMUSG00000061048 | 6.39            | 1.61          |
| Kctd12b    | 3.7         | 3.2E-21    | ENSMUSG00000041633  | 13.89           | 3.00          | Cacng4        | 3.2         | 1.4E-33    | ENSMUSG00000020723 | 31.51           | 7.82          |
| Tnik       | 3.7         | 1.1E-25    | ENSMUSG00000027692  | 3.83            | 0.81          | Prrx1         | 3.2         | 1.1E-04    | ENSMUSG00000026586 | 5.04            | 1.28          |
| Tgfb1      | 3.6         | 5.7E-05    | ENSMUSG00000035493  | 9.09            | 1.99          | Tmem35        | 3.1         | 2.0E-17    | ENSMUSG00000033578 | 40.16           | 9.87          |
| Gli1       | 3.6         | 5.6E-09    | ENSMUSG00000025407  | 7.53            | 1.62          | Fjx1          | 3.1         | 6.5E-30    | ENSMUSG00000075012 | 29.87           | 7.43          |
| Enc1       | 3.6         | 1.6E-30    | ENSMUSG00000041773  | 22.17           | 4.83          | Emp2          | 3.1         | 6.7E-10    | ENSMUSG00000022505 | 2.83            | 0.71          |
| Slc7a7     | 3.6         | 2.2E-24    | ENSMUSG00000000958  | 26.13           | 5.62          | Flnc          | 3.1         | 2.8E-04    | ENSMUSG00000068699 | 3.75            | 0.98          |
| Pipox      | 3.6         | 8.8E-10    | ENSMUSG00000017453  | 5.95            | 1.27          | Nfia          | 3.1         | 8.9E-06    | ENSMUSG00000028565 | 4.13            | 1.07          |
| Gpmb       | 3.6         | 8.0E-05    | ENSMUSG00000029816  | 16.18           | 3.59          | Vcam1         | 3.1         | 1.5E-03    | ENSMUSG00000027962 | 5.64            | 1.45          |
| Slc24a5    | 3.6         | 2.1E-04    | ENSMUSG00000035183  | 4.03            | 0.89          | Mmp14         | 3.1         | 3.5E-20    | ENSMUSG00000000957 | 62.64           | 16.14         |
| Trp53i11   | 3.6         | 3.1E-21    | ENSMUSG000000068735 | 28.17           | 6.25          | Tril          | 3.1         | 1.8E-06    | ENSMUSG00000043496 | 13.10           | 3.43          |
| Tyrp1      | 3.5         | 3.9E-04    | ENSMUSG00000005994  | 16.22           | 3.65          | Anpep         | 3.1         | 6.4E-05    | ENSMUSG00000039062 | 2.69            | 0.69          |
| Slc6a11    | 3.5         | 4.5E-20    | ENSMUSG00000030307  | 11.66           | 2.53          | Sema3f        | 3.1         | 1.2E-22    | ENSMUSG00000034684 | 20.57           | 5.28          |
| Zfx3       | 3.5         | 8.6E-07    | ENSMUSG00000038872  | 12.64           | 2.88          | Sncap         | 3.1         | 6.1E-04    | ENSMUSG00000024534 | 3.07            | 0.80          |
| Fat3       | 3.5         | 1.1E-11    | ENSMUSG00000074505  | 10.32           | 2.32          | Egfem1        | 3.1         | 8.2E-21    | ENSMUSG00000063600 | 20.82           | 5.31          |
| Fst        | 3.5         | 5.9E-09    | ENSMUSG00000021765  | 8.80            | 1.98          | Slc35d3       | 3.1         | 1.1E-04    | ENSMUSG00000050473 | 2.21            | 0.56          |
| Lrrn2      | 3.5         | 1.2E-15    | ENSMUSG00000026443  | 5.71            | 1.27          | Tmem119       | 3.1         | 9.7E-04    | ENSMUSG00000054675 | 5.63            | 1.47          |
| Pex5l      | 3.5         | 1.2E-13    | ENSMUSG00000027674  | 2.40            | 0.54          | Lars2         | 3.1         | 6.0E-03    | ENSMUSG00000035202 | 11537.92        | 3080.25       |
| Cpa3       | 3.5         | 6.7E-05    | ENSMUSG00000001865  | 4.20            | 0.95          | Pcdh9         | 3.1         | 5.5E-05    | ENSMUSG00000055421 | 2.60            | 0.67          |
| Igfbp2     | 3.5         | 2.4E-15    | ENSMUSG00000039323  | 118.60          | 26.93         | Tst           | 3.1         | 2.4E-18    | ENSMUSG00000044986 | 24.53           | 6.29          |
| Steap4     | 3.5         | 2.2E-07    | ENSMUSG00000012428  | 4.25            | 0.96          | Cd44          | 3.1         | 2.4E-03    | ENSMUSG00000005087 | 2.66            | 0.69          |
| Wispl      | 3.5         | 4.8E-03    | ENSMUSG000000005124 | 2.08            | 0.48          | Hs3st6        | 3.1         | 6.6E-07    | ENSMUSG00000039628 | 6.10            | 1.58          |
| Rab32      | 3.4         | 4.9E-12    | ENSMUSG00000019832  | 9.94            | 2.26          | Slc38a8       | 3.0         | 2.6E-03    | ENSMUSG00000034224 | 21.71           | 5.79          |
| Jam2       | 3.4         | 5.2E-35    | ENSMUSG00000053062  | 9.86            | 2.24          | Igf1          | 3.0         | 3.5E-05    | ENSMUSG00000020053 | 4.18            | 1.12          |
| Zfp462     | 3.4         | 2.9E-14    | ENSMUSG00000060206  | 20.46           | 4.80          |               |             |            |                    |                 |               |

| feature ID    | fold change | FDR Pvalue | ensembl gene id     | Prox1 mean RPKM | C57 mean RPKM | feature ID | fold change | FDR Pvalue | ensembl gene id    | Prox1 mean RPKM | C57 mean RPKM |
|---------------|-------------|------------|---------------------|-----------------|---------------|------------|-------------|------------|--------------------|-----------------|---------------|
| Col13a1       | 3.0         | 4.9E-38    | ENSMUSG00000058806  | 21.61           | 5.55          | Mam12      | 2.7         | 4.5E-19    | ENSMUSG00000031925 | 16.26           | 4.73          |
| Col9a2        | 3.0         | 5.4E-14    | ENSMUSG00000028626  | 28.97           | 7.50          | Col3a1     | 2.7         | 7.8E-04    | ENSMUSG00000026043 | 46.23           | 13.96         |
| Lpl           | 3.0         | 1.0E-25    | ENSMUSG00000015568  | 13.47           | 3.52          | Smim24     | 2.7         | 1.6E-03    | ENSMUSG00000078439 | 2.92            | 0.86          |
| Ldhb          | 3.0         | 2.0E-18    | ENSMUSG00000030246  | 81.89           | 21.44         | Stbd1      | 2.7         | 2.7E-08    | ENSMUSG00000047963 | 6.27            | 1.83          |
| Vash2         | 3.0         | 7.3E-28    | ENSMUSG00000037568  | 25.76           | 6.77          | Sepp1      | 2.7         | 2.3E-11    | ENSMUSG00000064373 | 62.12           | 18.56         |
| Dnm1          | 3.0         | 6.3E-04    | ENSMUSG00000026825  | 3.74            | 1.00          | Nupr1      | 2.7         | 2.2E-11    | ENSMUSG00000030717 | 116.88          | 33.45         |
| Col25a1       | 3.0         | 1.0E-04    | ENSMUSG00000058897  | 2.06            | 0.55          | Rnf165     | 2.7         | 1.9E-17    | ENSMUSG00000025427 | 13.72           | 4.03          |
| Cxcl12        | 3.0         | 2.2E-03    | ENSMUSG00000061353  | 4.66            | 1.28          | Sertad4    | 2.7         | 2.0E-03    | ENSMUSG00000016262 | 3.32            | 0.99          |
| Thbs2         | 3.0         | 2.9E-04    | ENSMUSG00000023885  | 3.84            | 1.01          | Lama4      | 2.7         | 1.6E-09    | ENSMUSG00000019846 | 13.31           | 4.01          |
| Car14         | 3.0         | 3.6E-16    | ENSMUSG00000038526  | 35.73           | 9.55          | Prkcb      | 2.7         | 3.0E-06    | ENSMUSG00000052889 | 2.59            | 0.76          |
| Lum           | 3.0         | 6.2E-05    | ENSMUSG00000036446  | 75.36           | 20.41         | Sh3pxd2a   | 2.7         | 9.7E-08    | ENSMUSG00000053617 | 15.55           | 4.66          |
| Calml3        | 2.9         | 9.9E-03    | ENSMUSG00000063130  | 3.47            | 0.94          | Irx5       | 2.6         | 4.8E-03    | ENSMUSG00000031737 | 2.93            | 0.86          |
| Egfr          | 2.9         | 8.0E-04    | ENSMUSG00000020122  | 2.80            | 0.77          | Hif3a      | 2.6         | 3.1E-10    | ENSMUSG00000004328 | 7.63            | 2.26          |
| Nes           | 2.9         | 5.1E-24    | ENSMUSG00000004891  | 124.95          | 33.66         | Slc1a3     | 2.6         | 3.1E-08    | ENSMUSG00000005360 | 6.45            | 1.92          |
| Cd83          | 2.9         | 5.5E-06    | ENSMUSG00000015396  | 3.53            | 0.94          | Creb3l2    | 2.6         | 9.4E-15    | ENSMUSG00000038648 | 27.83           | 8.35          |
| Rgma          | 2.9         | 1.8E-10    | ENSMUSG00000070509  | 6.91            | 1.86          | Akr1b10    | 2.6         | 1.7E-05    | ENSMUSG00000061758 | 2.06            | 0.62          |
| Mt2           | 2.9         | 3.1E-04    | ENSMUSG00000031762  | 5.68            | 1.52          | Ntf3       | 2.6         | 2.4E-03    | ENSMUSG00000049107 | 3.96            | 1.17          |
| Gm26917       | 2.9         | 4.8E-03    | ENSMUSG00000097971  | 4097.06         | 1152.77       | Fez1       | 2.6         | 2.9E-17    | ENSMUSG00000032118 | 16.29           | 4.87          |
| Dkk2          | 2.9         | 7.5E-04    | ENSMUSG00000028031  | 24.01           | 6.61          | Efemp1     | 2.6         | 4.1E-04    | ENSMUSG00000020467 | 11.52           | 3.47          |
| Ror2          | 2.9         | 2.2E-05    | ENSMUSG00000021464  | 3.52            | 0.97          | Slc9a3r1   | 2.6         | 2.7E-11    | ENSMUSG00000020733 | 28.26           | 8.55          |
| 5730559C18Rik | 2.9         | 5.6E-07    | ENSMUSG00000041605  | 5.89            | 1.63          | Prom1      | 2.6         | 5.3E-16    | ENSMUSG00000029086 | 23.87           | 7.23          |
| Pla2g4a       | 2.9         | 6.7E-27    | ENSMUSG00000056220  | 7.70            | 2.09          | Dok1       | 2.6         | 2.3E-09    | ENSMUSG00000068335 | 8.51            | 2.57          |
| 2700069I18Rik | 2.9         | 2.6E-05    | ENSMUSG00000086224  | 3.38            | 0.93          | Apod       | 2.6         | 7.5E-04    | ENSMUSG00000022548 | 2.39            | 0.72          |
| Mid2          | 2.9         | 5.7E-10    | ENSMUSG00000000266  | 3.29            | 0.90          | Dgkh       | 2.6         | 1.2E-03    | ENSMUSG00000034731 | 2.33            | 0.70          |
| Krt18         | 2.8         | 1.3E-05    | ENSMUSG00000023043  | 21.26           | 6.01          | Itpr3      | 2.6         | 1.8E-05    | ENSMUSG00000042644 | 2.70            | 0.83          |
| AY036118      | 2.8         | 7.7E-03    | ENSMUSG00000045999  | 175.12          | 50.59         | Jph2       | 2.6         | 2.1E-09    | ENSMUSG00000017817 | 4.07            | 1.23          |
| Rbm20         | 2.8         | 2.9E-08    | ENSMUSG00000043639  | 2.16            | 0.60          | Lingo1     | 2.6         | 8.9E-11    | ENSMUSG00000049556 | 4.10            | 1.24          |
| Bdh2          | 2.8         | 2.8E-05    | ENSMUSG00000028167  | 10.74           | 3.02          | Cryl1      | 2.6         | 2.4E-05    | ENSMUSG00000021947 | 3.49            | 1.05          |
| Fam101b       | 2.8         | 4.3E-20    | ENSMUSG00000020846  | 16.16           | 4.52          | Gm4524     | 2.6         | 1.0E-12    | ENSMUSG00000090257 | 16.01           | 4.81          |
| Chd3          | 2.8         | 1.5E-10    | ENSMUSG00000018474  | 27.76           | 7.93          | Mtcl1      | 2.6         | 4.2E-20    | ENSMUSG00000052105 | 22.25           | 6.82          |
| Gm14236       | 2.8         | 9.7E-03    | ENSMUSG00000086411  | 207.37          | 60.61         | Olfml3     | 2.6         | 1.8E-10    | ENSMUSG00000027848 | 30.96           | 9.23          |
| Mreg          | 2.8         | 8.7E-07    | ENSMUSG00000039395  | 3.57            | 1.01          | Crabp2     | 2.6         | 7.1E-06    | ENSMUSG00000004885 | 99.87           | 30.97         |
| Ddr2          | 2.8         | 3.0E-04    | ENSMUSG00000026674  | 5.51            | 1.59          | Adam19     | 2.6         | 7.0E-04    | ENSMUSG00000011256 | 2.88            | 0.91          |
| Ntrk2         | 2.8         | 3.0E-14    | ENSMUSG00000055254  | 9.05            | 2.54          | Anxa2      | 2.5         | 1.3E-12    | ENSMUSG00000032231 | 33.43           | 10.37         |
| Olfml1        | 2.8         | 4.2E-02    | ENSMUSG000000051041 | 2.42            | 0.70          | Slc6a15    | 2.5         | 8.6E-04    | ENSMUSG00000019894 | 17.03           | 5.32          |
| S100a1        | 2.8         | 1.5E-06    | ENSMUSG00000044080  | 8.40            | 2.39          | Clmp       | 2.5         | 3.6E-09    | ENSMUSG00000032024 | 7.36            | 2.29          |
| C230034O21Rik | 2.8         | 3.5E-02    | ENSMUSG00000086181  | 2.77            | 0.78          | Sparcl1    | 2.5         | 4.5E-14    | ENSMUSG00000029309 | 57.05           | 17.89         |
| Tenm4         | 2.7         | 8.5E-05    | ENSMUSG00000048078  | 8.47            | 2.46          | Fbln2      | 2.5         | 8.9E-04    | ENSMUSG00000064080 | 6.29            | 1.98          |
| Dmp1          | 2.7         | 2.5E-02    | ENSMUSG00000029307  | 22.74           | 6.84          | Col11a1    | 2.5         | 3.3E-03    | ENSMUSG00000027966 | 6.04            | 1.92          |
| Ccdc177       | 2.7         | 2.5E-09    | ENSMUSG00000062961  | 2.95            | 0.85          | Paqr4      | 2.5         | 8.3E-08    | ENSMUSG00000023909 | 6.13            | 1.91          |
| Sall2         | 2.7         | 2.8E-18    | ENSMUSG00000049532  | 43.54           | 12.57         | Optc       | 2.5         | 3.6E-02    | ENSMUSG00000010311 | 6.11            | 1.85          |
| Gzmm          | 2.7         | 1.5E-03    | ENSMUSG00000054206  | 2.93            | 0.84          | Clip1      | 2.5         | 6.1E-16    | ENSMUSG00000049550 | 12.94           | 4.08          |
| Rab27a        | 2.7         | 1.8E-04    | ENSMUSG00000032202  | 5.86            | 1.72          | Shank1     | 2.5         | 6.7E-08    | ENSMUSG00000038738 | 4.81            | 1.51          |
| Antxr1        | 2.7         | 1.1E-24    | ENSMUSG00000033420  | 67.56           | 19.41         | Fzd8       | 2.5         | 1.5E-07    | ENSMUSG00000036904 | 4.12            | 1.30          |
| Twist1        | 2.7         | 1.2E-02    | ENSMUSG00000035799  | 10.59           | 3.10          | Trib2      | 2.5         | 1.1E-23    | ENSMUSG00000020601 | 22.21           | 6.98          |
| Cdo1          | 2.7         | 5.1E-07    | ENSMUSG00000033022  | 12.86           | 3.72          |            |             |            |                    |                 |               |
